# Supplementary material for: Systematic Review of Management of Moderate Wasting in Children over 6 Months of Age
Source: MDPI journal article supplement (doi:10.3390/nu15173781), 2023-08-30

## Supporting information

**Supporting Figure S1a.** Quality of included studies- Cluster randomised trials.

| Study ID       | D1a: Randomisation process | D1b: Timing of identification or recruitment of participants | D2: Deviations from the intended interventions | D3: Missing outcome data | D4: Measurement of the outcome | D5: Selection of the reported result | Overall |
|----------------|----------------------------|--------------------------------------------------------------|------------------------------------------------|--------------------------|--------------------------------|--------------------------------------|---------|
| Lelijveld 2021 | +                          | +                                                            | !                                              | +                        | !                              | +                                    | !       |
| Nikiema 2014   | +                          | +                                                            | +                                              | +                        | -                              | +                                    | !       |

**Supporting Figure S1b.** Quality of included studies- Individually randomised trials.

| Study ID            | D1: Randomisation process | D2: Deviations from the intended interventions | D3: Missing outcome data | D4: Measurement of the outcome | D5: Selection of the reported result | Overall |
|---------------------|---------------------------|------------------------------------------------|--------------------------|--------------------------------|--------------------------------------|---------|
| Vanelli 2014        | !                         | +                                              | +                        | -                              | -                                    | -       |
| Hossain et al, 2011 | +                         | !                                              | +                        | !                              | +                                    | !       |
| Javan et al, 2017   | !                         | !                                              | +                        | +                              | +                                    | !       |

+ Low risk  
 ! Some concerns  
 - High risk

**Supporting Figure S2.** Forest plot of specially formulated foods compared to non-food-based approaches or none- Outcome: Weight-for-height z-score.

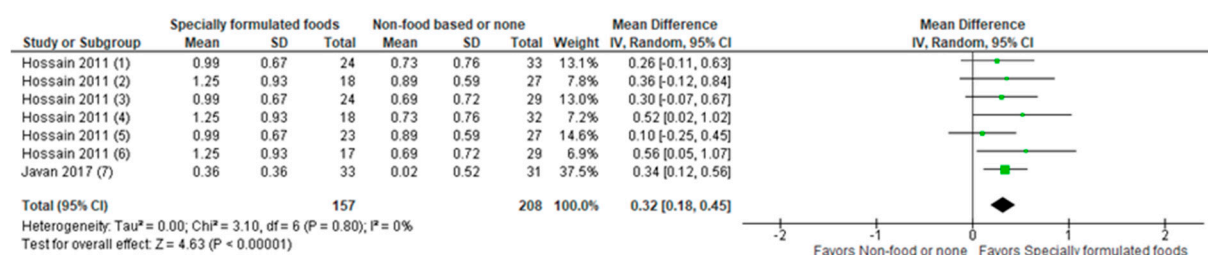

### Footnotes

- (1) Follow-up at community clinics + cereal-based supplementary food (C-SF) vs. fortnightly follow-up at community clinics (C-C); change in WHZ over a 3 months intervention period
- (2) Follow-up at community clinics + cereal-based supplementary food and psychosocial stimulation (C-SF+PS) vs. C-C plus psychosocial stimulation (C-PS); change in WHZ over 3 months
- (3) C-SF vs. followup at health clinics (H-C); change in WHZ over 3 months
- (4) C-SF+PS vs C-C; change in WHZ over 3 months
- (5) C-SF vs C-PS, Change in WHZ over 3 months
- (6) C-SF+PS vs H-C; change in WHZ over 3 months
- (7) Supplemented Blended Flour (Shadmeen) + Min/VIT + Counselling vs. MMN + Nutrition counselling; Increase in WHZ from baseline to endline

**Supporting Figure S3.** Forest plot of specially formulated foods compared to non-food-based approaches or none- Outcome: Deterioration to SAM.

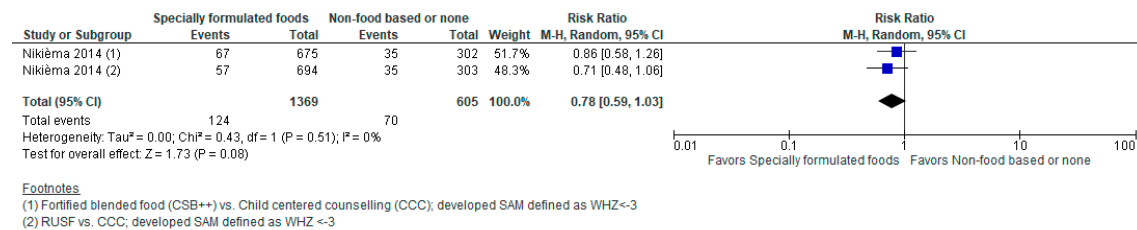

**Supporting Figure S4.** Forest plot of specially formulated foods compared to non-food-based approaches or none- Outcome: Weight-for-height z-score.

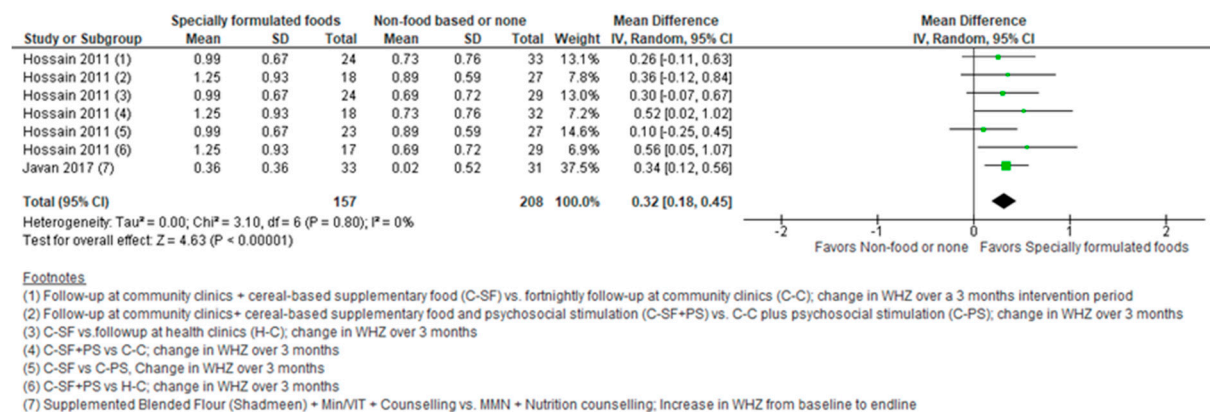

**Supporting Figure S5.** Forest plot of specially formulated foods compared to non-food-based approaches or none- Outcome: Weight-for-age z-score.

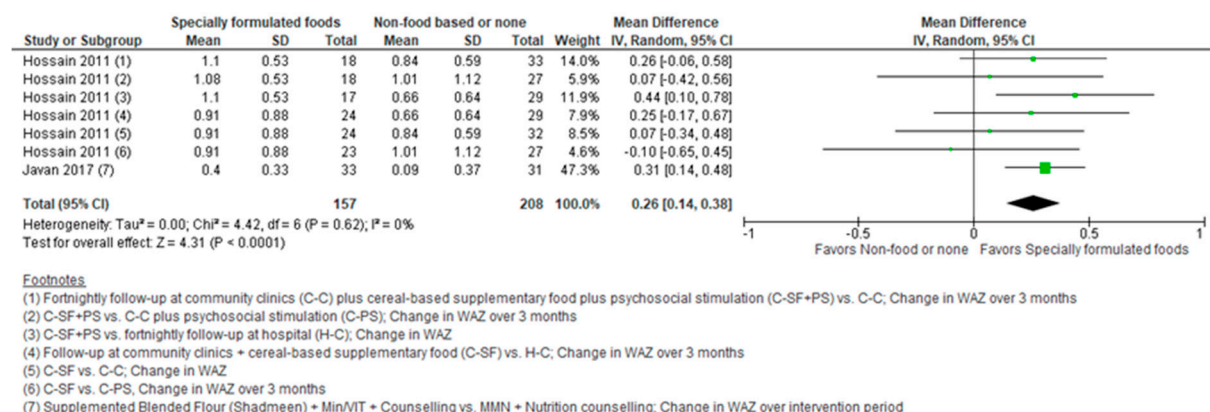

**Supporting Figure S6.** Forest plot of specially formulated foods compared to non-food-based approaches or none- Outcome: Height-for-age z-score.

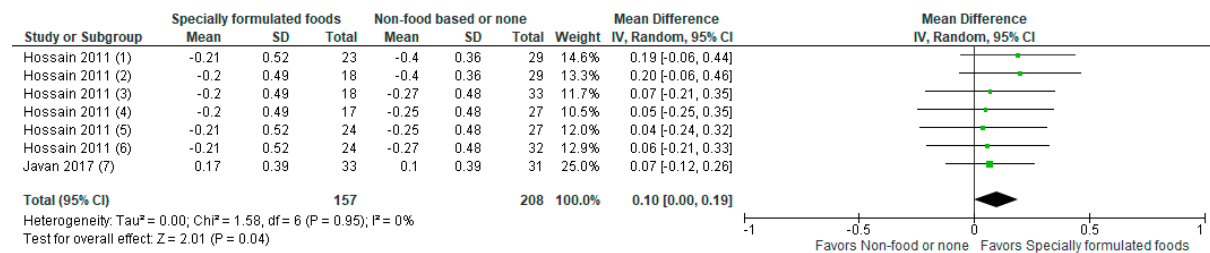

**Footnotes**

- (1) C-SF+PS vs. H-C; Change in HAZ over 3 months
- (2) Follow-up at community clinics + cereal-based supplementary food (C-SF) vs. followup at health clinics (H-C)
- (3) C-SF vs. fortnightly follow-up at community clinics (C-C); Change in HAZ over 3 months
- (4) C-SF vs. C-C plus psychosocial stimulation (C-PS); Change in HAZ over 3 months
- (5) Follow-up at community clinics+ cereal-based supplementary food and psychosocial stimulation (C-SF+PS) vs. C-PS; Change in HAZ over the 3 months intervention period
- (6) C-SF+PS vs. C-C; Change in HAZ over 3 months
- (7) Supplemented Blended Flour (Shadmeen) + Min/VIT + Counselling vs. MMN + Nutrition counselling; Change in HAZ over the intervention period

**Supporting Figure S7.** Forest plot of specially formulated foods compared to non-food-based approaches or none- Outcome: MUAC gain.

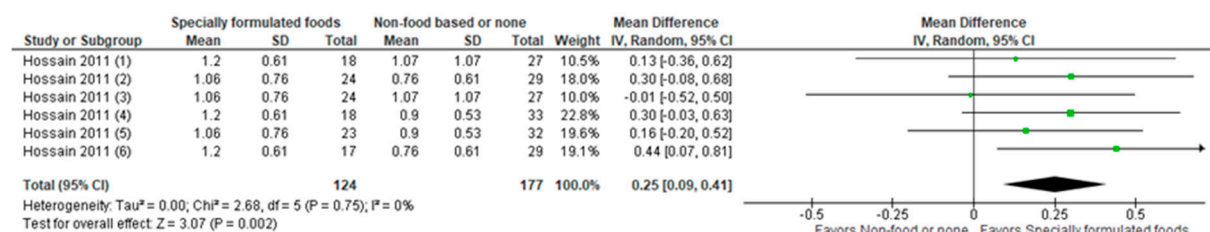

**Footnotes**

- (1) Follow-up at community clinics + cereal-based supplementary food and psychosocial stimulation (C-SF+PS) vs. C-C plus psychosocial stimulation (C-PS); Change in MUAC (cm) over the...
- (2) Follow-up at community clinics + cereal-based supplementary food (C-SF) vs. followup at health clinics (H-C)
- (3) C-SF vs C-PS; Change in MUAC (cm) over the intervention period
- (4) C-SF+PS vs. fortnightly follow-up at community clinics (C-C); Change in MUAC (cm) over the intervention period
- (5) C-SF vs. C-C; Change in MUAC (cm) over the intervention period
- (6) C-SF+PS vs. H-C; Change in MUAC (cm) over the intervention period

**Supporting Figure S8.** Forest plot of specially formulated foods compared to non-food-based approaches or none- Outcome: Weight gain.

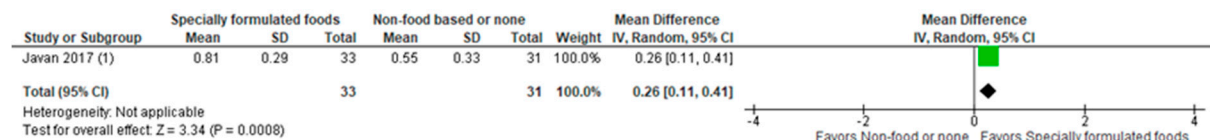

**Footnotes**

- (1) Supplemented Blended Flour (Shadmeen) + Multivitamin and mineral supplement (MMS) + Counselling vs. MMS + Nutrition counselling; Weight gain in grams from baseline to endline

**Supporting Figure S9.** Forest plot of specially formulated foods compared to non-food-based approaches or none- Outcome: Height gain.

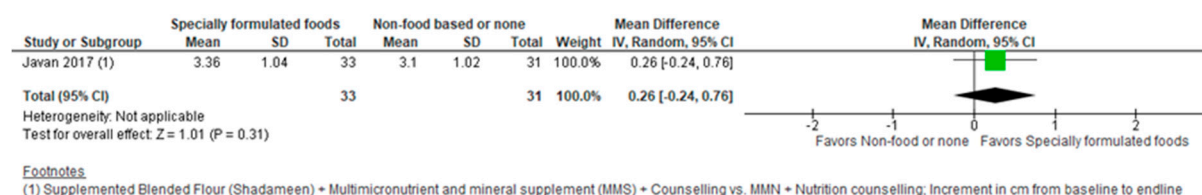

**Supporting Figure S10.** Forest plot of specially formulated foods compared to non-food-based approaches or none- Outcome: Non-response.

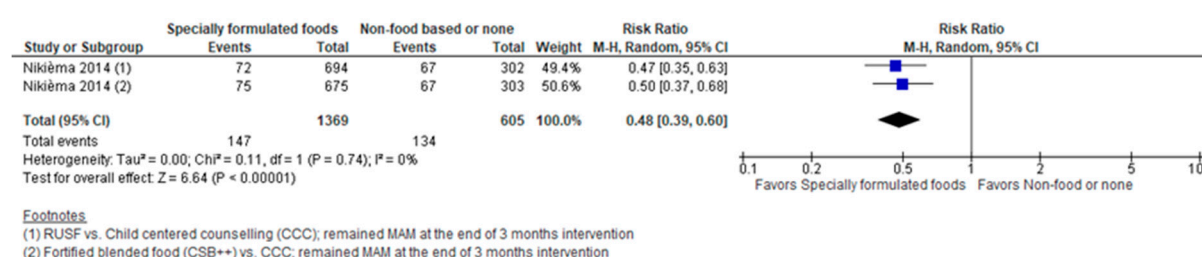

**Supporting Figure S11.** Forest plot of specially formulated foods compared to non-food-based approaches or none- Outcome: Time to recovery.

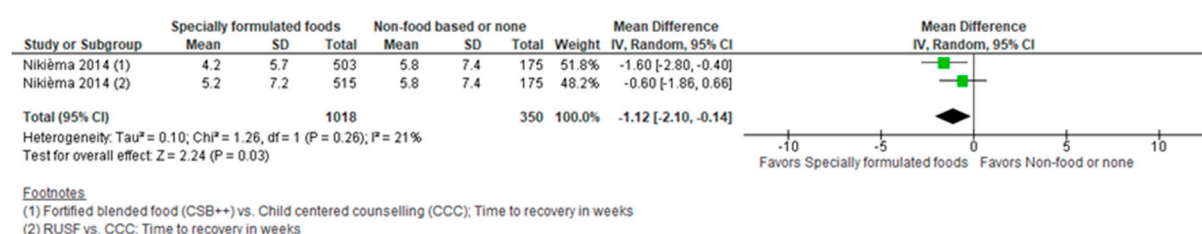

**Supporting Figure S12.** Forest plot of specially formulated foods compared to non-food-based approaches or none- Outcome: Mortality.

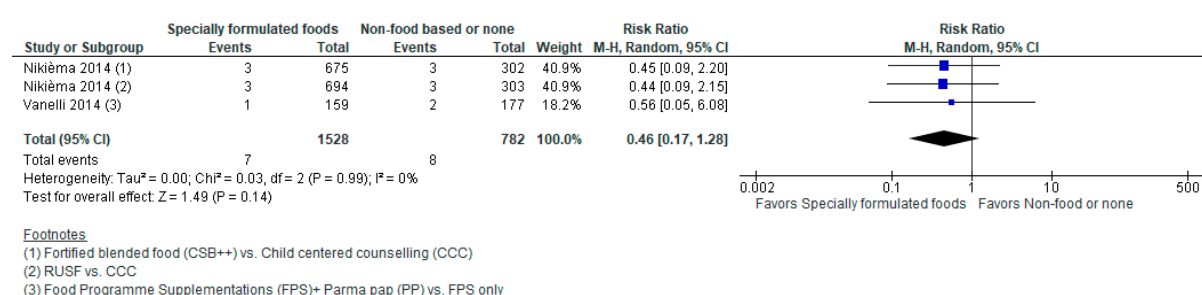

**Supporting Figure S13.** Forest plot of specially formulated foods compared to non-food-based approaches or none- Outcome: Recovery rate (subgroup analysis based on type of comparison group).

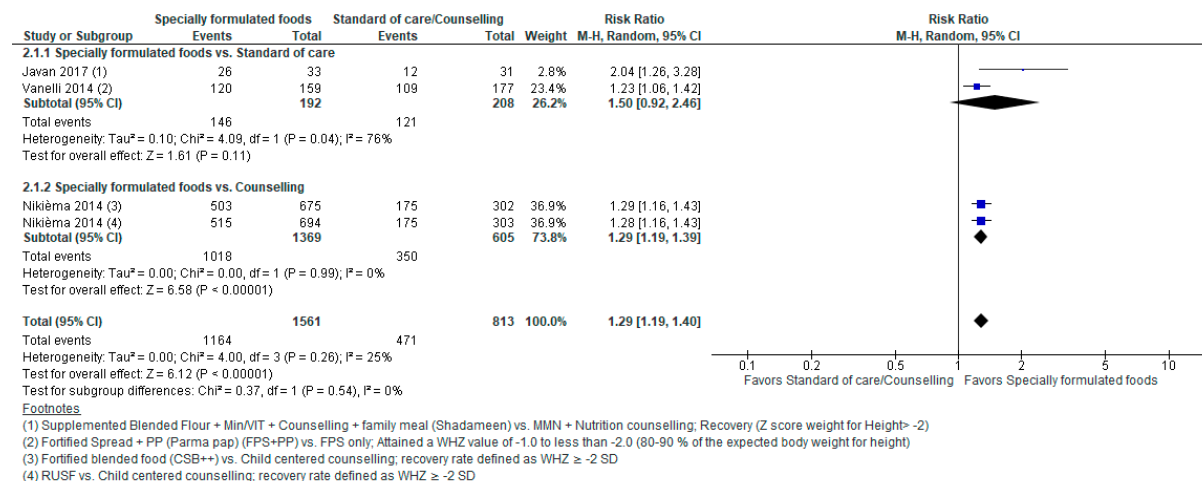

**Supporting Figure S14.** Forest plot of specially formulated foods compared to non-food-based approaches or none- Outcome: Mortality (subgroup analysis based on type of comparison group).

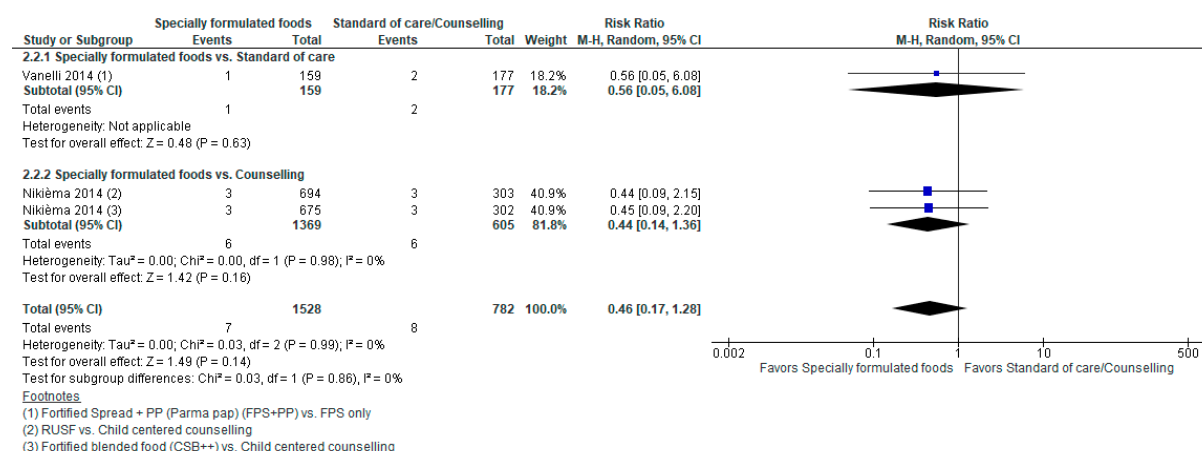

**Supporting Figure S15:** Forest plot of multicomponent intervention compared to non-food-based or none - Outcome: Recovery rate.

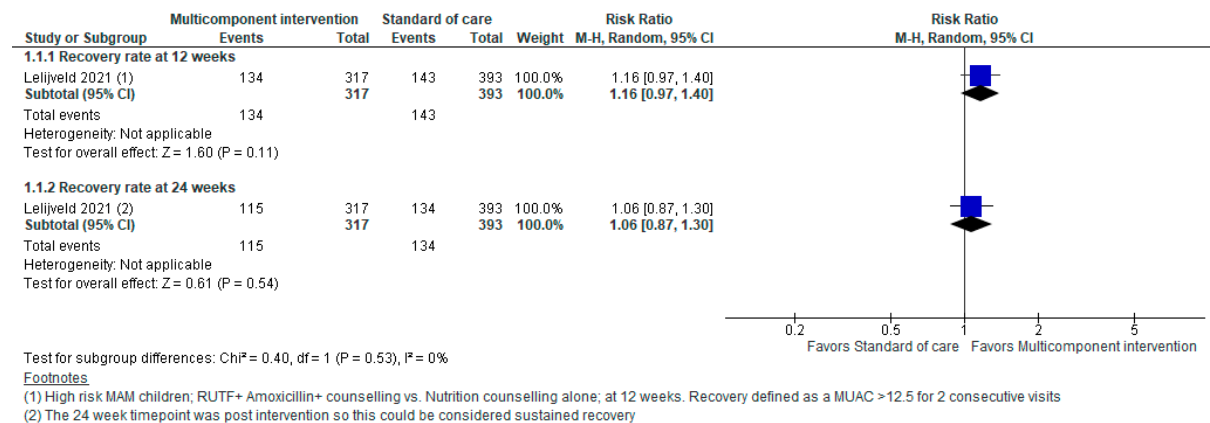

**Supporting Figure S16:** Forest plot of multicomponent intervention compared to non-food-based or none - Outcome: Deterioration to SAM.

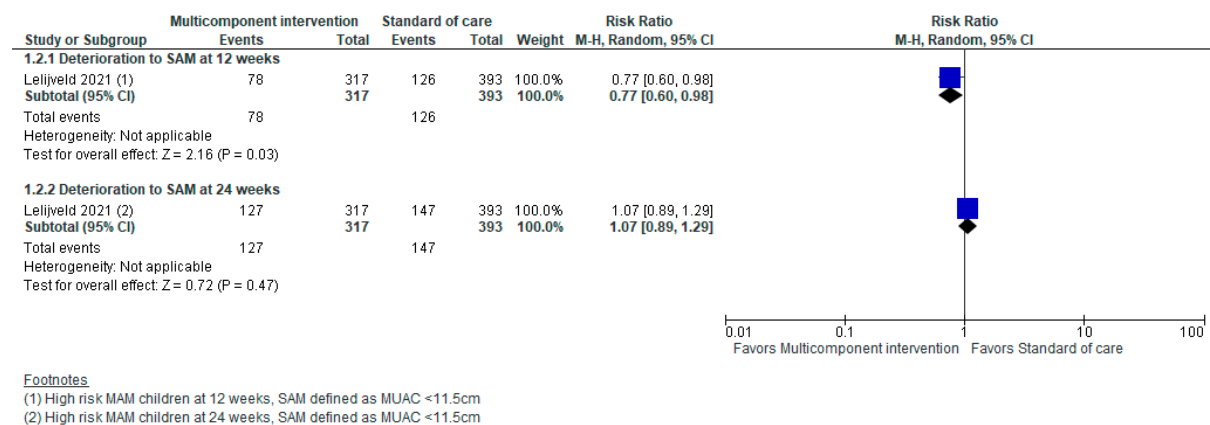

**Supporting Figure S17:** Forest plot of multicomponent intervention compared to non-food-based or none - Outcome: Weight for height z-score.

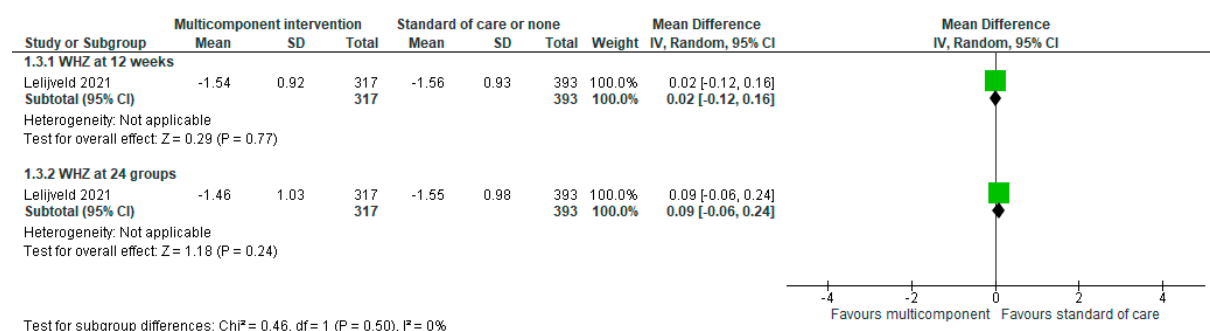



**Supporting Figure S18:** Forest plot of multicomponent intervention compared to non-food-based or none - Outcome: Weight for age z-score.

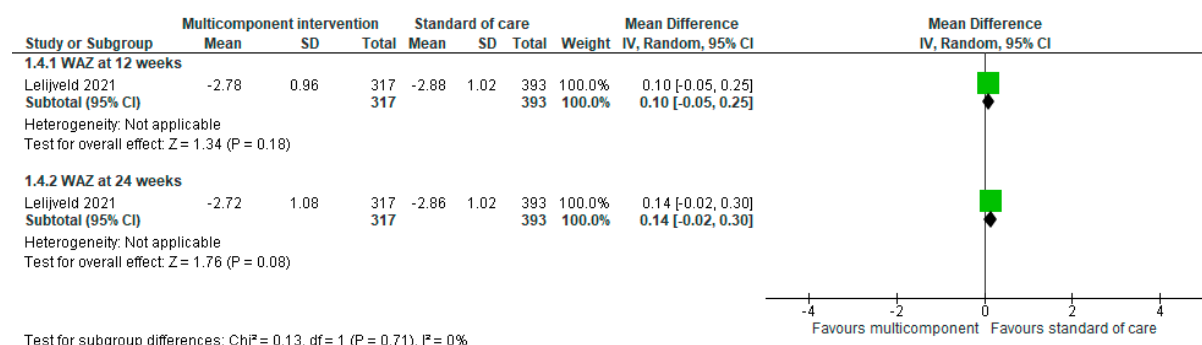

**Supporting Figure S19:** Forest plot of multicomponent intervention compared to non-food-based or none - Outcome: Height for age z-score.

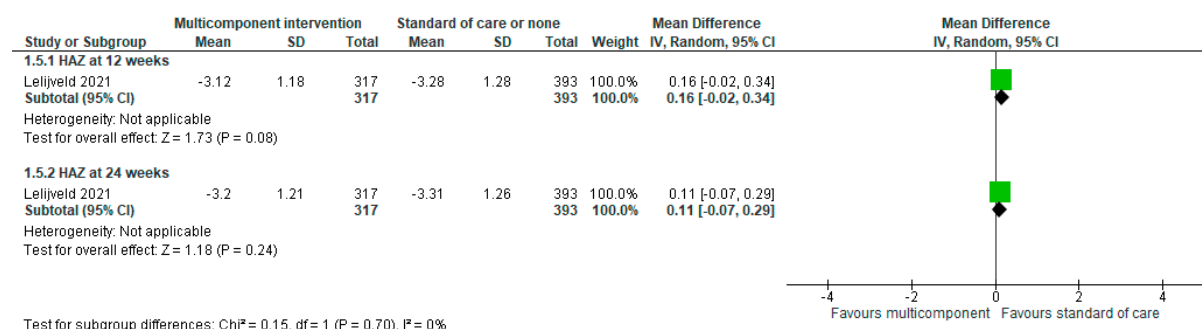

**Supporting Figure S20:** Forest plot of multicomponent intervention compared to non-food-based or none - Outcome: MUAC gain.

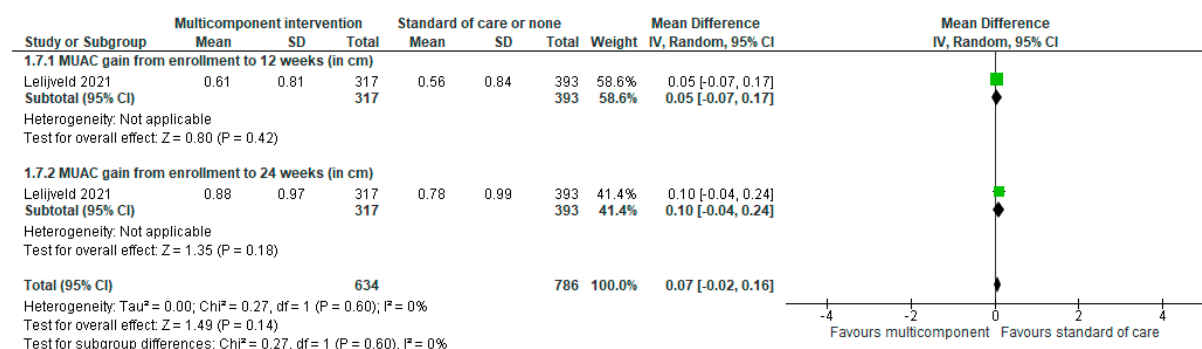

**Supporting Figure S21:** Forest plot of multicomponent intervention compared to non-food-based or none - Outcome: Weight gain.

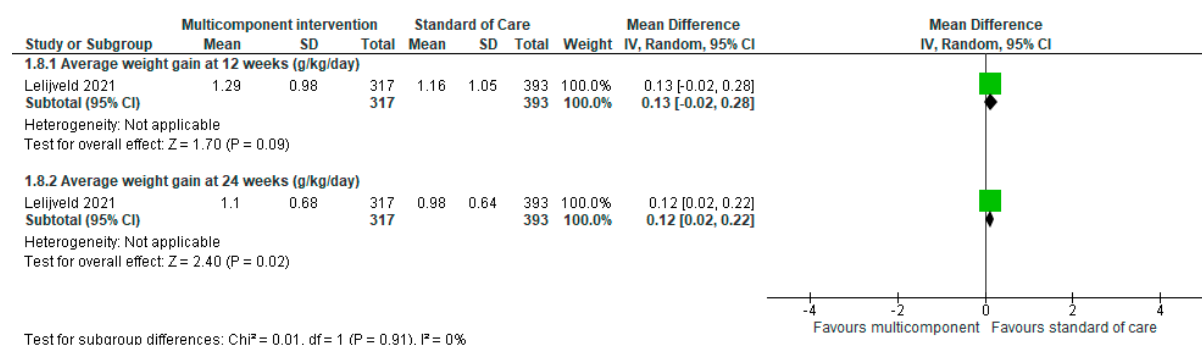

**Supporting Figure S22:** Forest plot of multicomponent intervention compared to non-food-based or none - Outcome: Non-response.

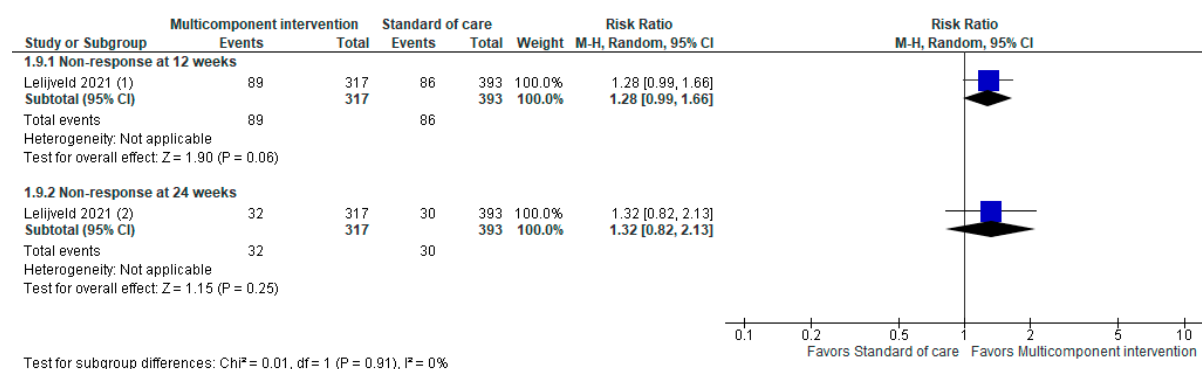

#### Footnotes

- (1) Remained with MAM  
(2) Remained with MAM at 24 weeks

**Supporting Figure S23:** Forest plot of multicomponent intervention compared to non-food-based or none - Outcome: Mortality.

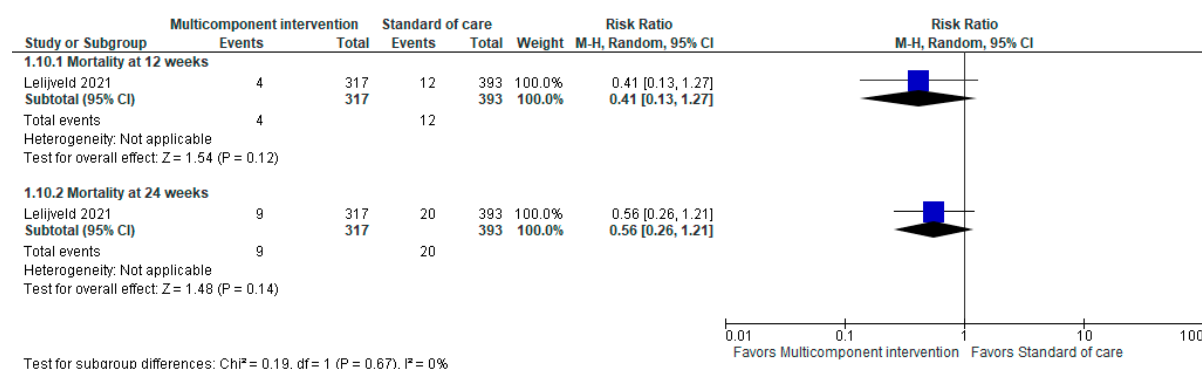

Supplement: s1 [file s1]
